# Supplementary material for: Identifying informal leaders among medical residents as a basis for educational interventions
Source: Research Square preprint supplement (doi:10.21203/rs.3.rs-8418016/v1), 2026-01-13
Supplement: Supplementary file 1 [file 005c1d20dfff3606b7a667e0.docx]

**Supplementary file 1:** Overview of the SNA and leadership survey

| **Section name** | **Question #** | **Question name** | **Possible Responses** |
| --- | --- | --- | --- |
| Survey start | - | Survey questionnaire opens with the presentation of the project and Ethics Committee, providing a link to the Consent Term by the Ethics Committee of Hospital de Clínicas de Porto Alegre and a questions of agreement for participating in the study. | Yes / No |
| Demographic data | 1–4 | Name; Age; Sex; Role in the Internal Medicine department | Full name; Numeric value; Male / Female; Preceptor, Resident (R1–R3). |
| 5 | Years of experience in the medical field (general) | Number of years |
| 6 | Years of experience in the Internal Medicine Service | Number of years |
| Name roster | 7 | From the list of names below, check those with whom you interact to obtain advice, information, or make work-related decisions | List of names of preceptors and medical residents from the IMS |
| In questions 8 to 15, indicate your level of agreement with the statements presented: | | | |
| Transformational Leadership | 8 | “I seek to inspire my team members, motivating them to develop their potential and exceed expectations, contributing beyond their usual responsibilities.” | Scores on a 5-point Likert scale: 1 - Strongly disagree; 2 - Partly disagree; 3 - Neutral; 4 - Partly agree; 5 - Strongly agree. |
| 9 | “I seek to promote a culture of change in my team, encouraging them to openly share their perspectives.” | Scores on a 5-point Likert scale: 1 - Strongly disagree; 2 - Partly disagree; 3 - Neutral; 4 - Partly agree; 5 - Strongly agree. |
| Relational Leadership | 10 | “I seek to develop and foster positive relationships among my team members, encouraging interaction and communication.” | Scores on a 5-point Likert scale: 1 - Strongly disagree; 2 - Partly disagree; 3 - Neutral; 4 - Partly agree; 5 - Strongly agree. |
| 11 | “I seek to encourage collaboration among my team members to achieve our common objectives.” | Scores on a 5-point Likert scale: 1 - Strongly disagree; 2 - Partly disagree; 3 - Neutral; 4 - Partly agree; 5 - Strongly agree. |
| Adaptive Leadership | 12 | “I encourage my team members to step out of their comfort zone and explore new solutions to the challenges we face.” | Scores on a 5-point Likert scale: 1 - Strongly disagree; 2 - Partly disagree; 3 - Neutral; 4 - Partly agree; 5 - Strongly agree. |
| 13 | “I can easily understand the complexity of situations, changing tactics or strate.g.ies as we adapt to new scenarios.” | Scores on a 5-point Likert scale: 1 - Strongly disagree; 2 - Partly disagree; 3 - Neutral; 4 - Partly agree; 5 - Strongly agree. |
| Resilient Leadership | 14 | “When an unexpected event occurs in my daily routine, I seek to prioritize managing my team’s stress level, maintaining emotional and mental balance.” | Scores on a 5-point Likert scale: 1 - Strongly disagree; 2 - Partly disagree; 3 - Neutral; 4 - Partly agree; 5 - Strongly agree. |
| 15 | “I can understand the variabilities that occur in my daily routine by monitoring, anticipating, and adjusting actions or resources according to imposed constraints.” | Scores on a 5-point Likert scale: 1 - Strongly disagree; 2 - Partly disagree; 3 - Neutral; 4 - Partly agree; 5 - Strongly agree. |
| In question 16, rank the four leadership styles presented from 1 to 4 in order of importance, where 1 indicates the most important style and 4 indicates the least important style. If you consider two or more styles equally important, you may assign them the same number. | | | |
|  | 16 | ( ) Transformational leader: **inspires the team** by communicating a clear direction, mobilizing people to action, based on **trust** and **motivation**.  ( ) Relational leader: acts as a **facilitator of relationships** among team members, valuing **social bonds** and **shared decision-making**.  ( ) Adaptive leader: focuses on providing **quick responses** and **disseminating information**. Mobilizes the team to face **complex problems** **without clear solutions**.  ( ) Resilient leader: demonstrates **emotional stability** and **recovery capacity** when faced with stress. Prioritizes **performance continuity** and **team support** in adverse situations. | |
| End of survey | - | Closing remarks | - |
